# Supplementary material for: Pan-cancer analysis demonstrates that integrating polygenic risk scores with modifiable risk factors improves risk prediction
Source: PubMed Central journal article supplement (PMC7695829; doi:10.1038/s41467-020-19600-4), 2020-11-27
Supplement: 41467_2020_19600_MOESM2_ESM.pdf [file 41467_2020_19600_MOESM2_ESM.pdf]

## **Description of Additional Supplementary Files**

File Name: Supplementary Data 1

Description: Genetic variants included in each cancer-specific polygenic risk score with risk alleles and corresponding weights.
